# Supplementary material
Source: publisher figshare collection journal article supplement (https://geolsoc.figshare.com/ndownloader/files/36476727)
Supplement: Supplementary file 1 [file 36476727]

Table 1: List of reported Palaeolithic and fossil sites in Narmada Valley, Central India.

| **Site name** | **District** | **Palaeolithic Culture(s) & Quaternary Fossil remains** | | | | **Reference(s)** |
| --- | --- | --- | --- | --- | --- | --- |
| **Lower Paleolithic** | **Middle Palaeolithic** | **Upper Palaeolithic** | **Fossil** |
| **Sites in Madhya Pradesh** | |  |  |  |  |  |
| Anarkhera | Dhinori |  | + |  |  | IAR (1998-99) |
| Barga | Dhinori |  | + |  |  | IAR (1998-99) |
| Bargaon | Dhinori |  | + |  |  | IAR (1998-99) |
| Bharwa | Dhinori |  | + |  |  | IAR (1998-99) |
| Dhindori | Dhinori |  | + |  |  | IAR (1961-62) |
| Gwara | Dhinori |  | + |  |  | IAR (1998-99) |
| Jhinjhari | Dhinori |  | + |  |  | IAR (1998-99) |
| Kanchanpur | Dhinori |  | + |  |  | IAR (1998-99) |
| Karigaderi-Tikratol | Dhinori |  | + |  |  | IAR (1998-99) |
| Khajari | Dhinori |  | + |  |  | IAR (1998-99) |
| Mohgaon | Dhinori |  | + |  |  | IAR (1998-99) |
| Nigwanigarh-Pahar | Dhinori |  | + |  |  | IAR (1961-62); IAR (1998-99) |
| Padaria | Dhinori |  | + |  |  | IAR (1998-99) |
| Sahapura | Dhinori |  | + |  |  | IAR (1998-99) |
| Sharda-Mandir | Dhinori |  | + |  |  | IAR (1998-99) |
| Bargoan | Dindori |  |  |  |  | IAR (1998-99) |
| Chandpur | Dindori | + |  |  |  | IAR (1998-99) |
| Chatwa/Chatua | Dindori |  |  | + |  | History, Archaeology & culture of Narmada Valley 2007 (Edited by R.K. Sharma) |
| Ghodamada* | Dindori |  |  | + |  | History, Archaeology & culture of Narmada Valley 2007 (Edited by R.K. Sharma) |
| Kudwan | Dindori |  |  | + |  | History, Archaeology & culture of Narmada Valley 2007 (Edited by R.K. Sharma) |
| Samnapur | Dindori |  |  | + |  | History, Archaeology & culture of Narmada Valley 2007 (Edited by R.K. Sharma) |
| Sivatekari | Dindori |  |  | + |  | History, Archaeology & culture of Narmada Valley 2007 (Edited by R.K. Sharma) |
| Umaria | Dindori |  |  | + |  | History, Archaeology & culture of Narmada Valley 2007 (Edited by R.K. Sharma) |
| Andai (Andia) | Mandla |  |  | + |  | History, Archaeology & culture of Narmada Valley 2007 (Edited by R.K. Sharma) |
| Deora | Mandla |  |  |  |  | IAR (1996-97) |
| Fonk | Mandla | + |  |  |  | IAR (1996-97) |
| Gundawamada | Mandla | + |  |  |  | IAR (1996-97) |
| Kosamghat | Mandla | + |  |  |  | IAR (1996-97) |
| Kukarrmath | Mandla | + | + |  |  | IAR 1960-70 |
| Lafra | Mandla |  |  | + |  | History, Archaeology & culture of Narmada Valley 2007 (Edited by R.K. Sharma) |
| Limarua | Mandla |  |  | + |  | History, Archaeology & culture of Narmada Valley 2007 (Edited by R.K. Sharma) |
| Madhupuri | Mandla |  |  | + |  | History, Archaeology & culture of Narmada Valley 2007 (Edited by R.K. Sharma) |
| Manot | Mandla |  |  |  |  | IAR (1960-61) |
| Matiyari, on the bank of river Banjar | Mandla |  | + | + |  | Post Pleistocene deposits and associated lithic Industries in the Narmada Valley at Matiyar, Madhya pradesh. Journal of Human Evolution 1983 |
| Medha | Mandla | + |  |  |  | IAR (1996-97) |
| Padaria | Mandla |  |  | + |  | History, Archaeology & culture of Narmada Valley 2007 (Edited by R.K. Sharma) |
| Phitari | Mandla | + |  |  |  | IAR (1996-97) |
| Piparia | Mandla | + |  |  |  | IAR (1996-97) |
| Raipura | Mandla |  |  | + |  | History, Archaeology & culture of Narmada Valley 2007 (Edited by R.K. Sharma) |
| Sakawah Kalan | Mandla |  |  | + |  | History, Archaeology & culture of Narmada Valley 2007 (Edited by R.K. Sharma) |
| Sijhora | Mandla | + |  |  |  | IAR (1996-97) |
| Chikhalatola | Seoni |  | + | + |  | IAR (1998-99); History, Archaeology & culture of Narmada Valley 2007 (Edited by R.K. Sharma) |
| Malkhera | Seoni |  | + | + |  | IAR (1998-99); History, Archaeology & culture of Narmada Valley 2007 (Edited by R.K. Sharma) |
| Amera | Jabalpur | + | + |  |  | IAR (1958-59) |
| Bargi (dam Site) | Jabalpur | + | + |  |  | IAR (1976-77) |
| Batai | Jabalpur |  | + |  |  | IAR (1959-60);IAR (1960-61) |
| Bedaghat | Jabalpur | + |  |  |  | IAR (1960-61); IAR (1958-59) |
| Bhikampur | Jabalpur |  | + |  |  | IAR (1960-61) |
| Bhita | Jabalpur |  | + |  |  | IAR (1960-61) |
| Birhaula-khera | Jabalpur |  | + |  |  | IAR (1959-60) |
| Bisanpura | Jabalpur |  | + |  |  | IAR (1958-59) |
| Chaurai khurd | Jabalpur |  | + |  |  | IAR (1958-59) |
| Chhirpani | Jabalpur |  | + |  |  | IAR (1958-59) |
| Chousath-Yogini Hill | Jabalpur | + | + |  |  | IAR (1976-77) |
| Dargarh | Jabalpur | + | + |  |  | IAR (1958-59) |
| Deori doli | Jabalpur |  | + |  |  | IAR (1959-60) |
| Deori-Sunwara | Jabalpur |  | + |  |  | IAR (1960-61) |
| Doli | Jabalpur | + |  |  |  | IAR (1959-60) |
| Doonda | Jabalpur |  | + |  |  | IAR (1958-59); IAR (1959-60) |
| Gauriya | Jabalpur |  | + |  |  | IAR (1959-60) |
| Gopalpur | Jabalpur | + | + |  |  | IAR (1976-77) |
| Gwarighat | Jabalpur | + |  |  |  | IAR (1958-59) |
| Jamgoan | Jabalpur | + | + |  |  | IAR (1958-59) |
| Jhansighat | Jabalpur | + | + |  |  | IAR (1976-77) |
| Kalan | Jabalpur |  | + |  |  | IAR (1959-60) |
| Kashtra | Jabalpur | + | + |  |  | IAR (1958-59); Sen and Ghosh 1964 |
| Keolari | Jabalpur |  | + |  |  | IAR (1959-60) |
| Khajarwara | Jabalpur |  | + |  |  | IAR (1959-60) |
| Kiriaghat | Jabalpur |  |  |  | + | IAR (1998-99) |
| Kulon | Jabalpur |  | + |  |  | IAR (1960-61) |
| Kundan | Jabalpur | + | + |  |  | IAR (1958-59) |
| Lakhanvara | Jabalpur |  | + |  |  | IAR (1958-59) |
| Lametaghat | Jabalpur | + | + |  |  | Sen and Ghosh 1965 |
| madan mahal hills | Jabalpur | + |  |  |  | IAR (1956-57) |
| Negai | Jabalpur | + |  |  |  | IAR (1958-59) |
| Nimkheda | Jabalpur |  | + |  |  | IAR (1959-60) |
| Pipari | Jabalpur | + |  |  |  | IAR (1959-60) |
| Rampuri Kalan | Jabalpur | + | + |  |  | IAR (1958-59) |
| Sakri | Jabalpur | + |  |  |  | Sen and Ghosh 1967 |
| Saliwada | Jabalpur |  | + |  |  | IAR (1959-60) |
| Sarangpur | Jabalpur |  | + |  |  | IAR (1958-59) |
| Saroli | Jabalpur |  | + |  |  | IAR (1958-59) |
| Singrampur | Jabalpur | + | + |  |  | IAR (1976-77) |
| Supawara | Jabalpur |  | + |  |  | IAR (1958-59) |
| Tilwaraghat | Jabalpur | + | + |  |  | Sen and Ghosh 1970 |
| Ajhera | Narsinghpur |  |  |  | + | IAR (1958-59) |
| Amonda | Narsinghpur |  |  |  | + | Chauhan *et al.* 2013 |
| Andia | Narsinghpur |  |  |  | + | Paleontologia India vol 53, 2011 |
| Anghora | Narsinghpur |  |  |  | + | Paleontologia India vol 53, 2011 |
| Barbati | Narsinghpur |  |  |  | + | Paleontologia India vol 53, 2011 |
| Barmanghat | Narsinghpur | + |  |  | + | Sen and Ghosh 1963 |
| Belghat | Narsinghpur |  |  | + |  | Salahuddin and Badam 1983 |
| Bhatgaon | Narsinghpur |  |  |  | + | IAR (1958-59) |
| Bhutra | Narsinghpur | + |  |  |  | Record of geological survey 1873 |
| Bikor | Narsinghpur |  |  |  | + | Paleontologia India vol 53, 2011 |
| Bilthari I | Narsinghpur |  |  |  | + | Theobald 1939 |
| Chauras | Narsinghpur |  |  |  | + | Paleontologia India vol 53, 2011 |
| Chinnadaghat, Varurewa river | Narsinghpur | + | + |  | + | IAR (1981-82) |
| Darticachar (Dhartkachhar) | Narsinghpur |  |  |  | + | Theobald 1939;Paleontologia India vol 53, 2011 |
| Daubaro, Varurewa river | Narsinghpur |  |  | + |  | IAR (1981-82), Salahuddin and Badam 1983 |
| Deva Kachar | Narsinghpur | + | + | + | + | IAR (1972-73); IAR (1977-78) |
| Dindori-Pakhri | Narsinghpur | + | + | + |  | IAR (1964-65) |
| Dobghat, Umer river | Narsinghpur | + | + |  | + | IAR (1981-82) |
| Guarighat on Sher river | Narsinghpur | + |  |  | + | IAR (1985-86) |
| Jhalon | Narsinghpur |  |  |  | + | Paleontologia India vol 53, 2011 |
| Jhansighat | Narsinghpur |  |  |  | + | Paleontologia India vol 53, 2011 |
| Jhilpiparia | Narsinghpur |  |  | + |  | IAR (1960-61);Sen and Ghosh 1963 |
| Jilaharighat | Narsinghpur |  |  |  | + | Paleontologia India vol 53, 2011 |
| Kallakacch Chooti | Narsinghpur |  |  |  | + | Paleontologia India vol 53, 2011 |
| Kelkach | Narsinghpur |  |  |  | + | Theobald 1939 |
| Khamaria | Narsinghpur |  | + |  |  | Salahuddin abd Badam 1983 |
| Khamghat | Narsinghpur |  |  |  | + | Paleontologia India vol 53, 2011 |
| Komdi , Sher River | Narsinghpur | + | + |  | + | IAR (1981-82) |
| Kymori | Narsinghpur |  |  |  | + | Theobald 1939 |
| Belghat, Sher river | Narsinghpur |  |  |  |  | IAR (1985-86) |
| Magardha | Narsinghpur |  | + |  |  | Salahuddin abd Badam 1984 |
| Mahadeo-piparia* | Narsinghpur | + |  |  |  | IAR (1964-65); IAR (1966-67) |
| Malakachhar | Narsinghpur |  |  |  | + | Paleontologia India vol 53, 2011 |
| Mungwani Rastoria | Narsinghpur |  |  | + |  | Salahuddin abd Badam 1982 |
| Murgakhera | Narsinghpur | + |  |  |  | Khatri 1963 |
| Patera I | Narsinghpur |  |  |  | + | Theobald 1939 |
| Patlon | Narsinghpur |  |  |  | + | Salahuddin abd Badam 1986 |
| Patrora | Narsinghpur |  |  |  | + | Theobald 1939 |
| Pawla | Narsinghpur |  |  |  | + | Paleontologia India vol 53, 2011 |
| Piparia | Narsinghpur | + |  |  | + | IAR (1959-60) |
| Rampiparia, on Singhri Nalla | Narsinghpur | + | + |  | + | IAR (1981-82) |
| Rampura | Narsinghpur | + |  |  |  | IAR (1985-86) |
| Ratikarar | Narsinghpur | + | + |  | + | Sen and Ghosh 1966 |
| Richhwar | Narsinghpur |  |  |  | + | Paleontologia India vol 53, 2011 |
| Sagunghat (Sagonghat) | Narsinghpur | + | + |  | + | IAR (1962-63) |
| Samnapur* | Narsinghpur |  | + |  | + | Misra *et al.*  1990 |
| Sankal | Narsinghpur |  |  |  | + | Paleontologia India vol 53, 2011 |
| Shiam Khera | Narsinghpur |  | + |  |  | Salahuddin abd Badam 1985 |
| Shitalpur | Narsinghpur |  |  |  | + | Paleontologia India vol 53, 2011 |
| Talayaghat | Narsinghpur | + | + |  | + | IAR (1985-86) |
| Tiapani | Narsinghpur |  |  |  | + | Paleontologia India vol 53, 2011 |
| Timmeroun (Timrawan) | Narsinghpur |  |  |  | + | Theobald 1939 |
| Umaria | Narsinghpur |  | + |  | + | Salahuddin 1987, Badam 2007 |
| Hasalpur | Hosangabad | + |  |  |  | Khatri 1962 |
| Kankarghat | Hosangabad | + |  |  |  | Khatri 1964 |
| Pilikarar | Hosangabad | + |  |  |  | Sharma and Sharma 2005; Patnaik and chauhan 2011 |
| Seoni | Hosangabad |  |  | + | + | IAR (1960-61) |
| Adamgarh* | Hoshangabad | + |  |  |  | IAR (1960-61) |
| Barha Kalan | Hoshangabad |  |  |  | + | Paleontologia India vol 53, 2011 |
| Barkhedi | Hoshangabad | + | + |  | + | Sen and Ghosh 1963 |
| Damar | Hoshangabad |  |  |  | + | Paleontologia India vol 53, 2011 |
| Dhamasa | Hoshangabad | + |  |  |  | IAR (1961-62) |
| Dongarwara | Hoshangabad | + |  |  |  | IAR (1960-61) |
| Hathnora* | Hoshangabad | + | + |  | + | IAR (1984-85); IAR (1985-86);Sonakia 1985; Sonakia and Biswas 1998 |
| Isharpur | Hoshangabad |  |  |  | + | Paleontologia India vol 53, 2011 |
| Joga Kalan | Hoshangabad | + |  |  |  | IAR (1974-75) |
| Joshipur | Hoshangabad |  |  |  | + | Paleontologia India vol 53, 2011 |
| Kevli | Hoshangabad |  |  |  | + | Paleontologia India vol 53, 2011 |
| Macha | Hoshangabad |  |  |  | + | Paleontologia India vol 53, 2011 |
| Mangrol | Hoshangabad | + |  |  |  | IAR (1974-75) |
| Mowar | Hoshangabad |  |  |  | + | Paleontologia India vol 53, 2011 |
| Nadner | Hoshangabad |  |  |  | + | Paleontologia India vol 53, 2011 |
| Nayapura | Hoshangabad | + |  |  |  | IAR (1974-75) |
| Sandia | Hoshangabad |  | + |  | + | IAR (1958-59); IAR (1960-61) |
| Sandla | Hoshangabad |  |  |  | + | Paleontologia India vol 53, 2011 |
| Sivni | Hoshangabad |  |  |  | + | Paleontologia India vol 53, 2011 |
| Sonkhera | Hoshangabad |  |  |  | + | Paleontologia India vol 53, 2011 |
| Surania | Hoshangabad |  |  |  | + | Patnaik et al. 2009; Paleontologia India vol 53, 2011 |
| Surela | Hoshangabad |  |  |  | + | Paleontologia India vol 53, 2011 |
| Bandrabhan | Hoshnagabad | + | + |  | + | Sankhyan et al. 2007 |
| Dhansi | Hoshnagabad | + |  |  | + | Sankhyan et al. 2007; Patnaik et al. 2009 |
| Gurla | Hoshnagabad | + |  |  | + | Sankhyan et al. 2007; Patnaik et al. 2009; |
| Khiria | Hoshnagabad | + | + |  | + | Patnaik et al. 2009; IAR 2012-13;Paleontologia India vol 53, 2011 |
| Netankheri | Hoshnagabad | + | + |  | + | Sankhyan et al. 2007; Sankhyan et al. 2013 |
| Sardarnagar | Hoshnagabad | + | + |  | + | Sankhyan et al. 2007; Sankhyan et al. 2014 |
| Surajkund | Hoshnagabad | + |  |  | + | IAR (1994-95); Sankhyan et al. 2007; Sankhyan et al. 2015 |
| Surania | Hoshangabad | + |  |  | + | Sankhyan et al. 2007 |
| Akola | Sehore | + |  |  |  | IAR (1994-95) |
| Amargarh | Sehore | + |  |  |  | IAR (1994-95) |
| Chachmou | Sehore | + |  |  |  | IAR (1994-95) |
| Dongria | Sehore | + |  |  |  | IAR (1994-95) |
| Makoria | Sehore | + |  |  |  | IAR (1994-95) |
| Nangpur | Sehore | + |  |  |  | IAR (1994-95) |
| Nimton | Sehore | + |  |  |  | IAR (1994-95) |
| Ramnagar | Sehore | + |  |  |  | IAR (1994-95) |
| Sankheri | Sehore | + |  |  |  | IAR (1994-95) |
| Bhadugaon | Harda | + | + |  |  | IAR (1974-75) |
| Handia | Harda | + | + |  |  | IAR (1974-75) |
| Malpone | Harda | + | + |  |  | IAR (1974-75) |
| Hirapur Khadan* | Harda | + | + |  |  | IAR (1986-87); IAR (1974-75) |
| Sigon | Harda | + |  |  |  | IAR (1985-86) |
| Abhawa | Khandwa | + | + |  |  | IAR (1987-88) |
| Balri | Khandwa |  | + |  |  | IAR (1987-88); IAR (1974-75) |
| Balwara* | Khandwa | + |  |  |  | IAR (1987-88); Salvage archaeology (Human origins, genome and peolple of india 2007) |
| Barhgaon Raiyat | Khandwa |  | + |  |  | IAR (1987-88) |
| Bijalpur Khurd | Khandwa | + |  |  |  | IAR (1987-88) |
| Boria | Khandwa | + | + |  |  | IAR (1987-88); Salvage archaeology (Human origins, genome and peolple of india 2007) |
| Chandgarh | Khandwa |  | + |  |  | IAR (1987-88) |
| Ganbgakheri | Khandwa | + |  |  |  | IAR (1982-83) |
| Jamoti | Khandwa | + |  |  |  | IAR (1987-88) |
| Jamunya | Khandwa |  | + |  |  | IAR (1987-88) |
| Jatam | Khandwa |  | + |  |  | IAR (1987-88) |
| Katgarha | Khandwa | + |  |  |  | IAR (1982-83) |
| Mathni | Khandwa |  | + |  |  | IAR (1987-88) |
| Naoghata | Khandwa | + |  |  |  | IAR (1987-88) |
| Nawghat | Khandwa |  | + |  |  | IAR (1987-88) |
| Nirguria Mal | Khandwa |  | + |  |  | IAR (1987-88) |
| Pamakheri | Khandwa |  | + |  |  | IAR (1987-88) |
| Pandiyadeh | Khandwa |  | + |  |  | IAR (1987-88) |
| Purni | Khandwa | + |  |  |  | IAR (1987-88) |
| Sarai | Khandwa | + |  |  |  | IAR (1987-88) |
| Anjaniya | Khandwa |  | + |  |  | Salvage archaeology (Human origins, genome and peolple of india 2007) |
| Balikeshwar | Khandwa |  | + |  |  | Salvage archaeology (Human origins, genome and peolple of india 2007) |
| Gondikhera | Khandwa |  | + |  |  | Salvage archaeology (Human origins, genome and peolple of india 2007) |
| Jhagria Raiyat | Khandwa |  | + |  |  | Salvage archaeology (Human origins, genome and peolple of india 2007) |
| Kaladev | Khandwa |  | + |  |  | IAR (1987-88); Salvage archaeology (Human origins, genome and peolple of india 2007) |
| Kharurewa | Khandwa |  | + |  |  | Salvage archaeology (Human origins, genome and peolple of india 2007) |
| Khudia Mal | Khandwa |  | + |  |  | Salvage archaeology (Human origins, genome and peolple of india 2007) |
| Kotra Bijalpur Khurd | Khandwa |  | + |  |  | Salvage archaeology (Human origins, genome and peolple of india 2007) |
| Malod | Khandwa |  | + |  |  | Salvage archaeology (Human origins, genome and peolple of india 2007) |
| Newalkhera | Khandwa |  | + |  |  | Salvage archaeology (Human origins, genome and peolple of india 2007) |
| Niguria Theka | Khandwa |  | + |  |  | Salvage archaeology (Human origins, genome and peolple of india 2007) |
| Raiyat | Khandwa | + |  |  |  | Salvage archaeology (Human origins, genome and peolple of india 2007) |
| Regwan | Khandwa |  | + |  |  | Salvage archaeology (Human origins, genome and peolple of india 2007) |
| Somapura | Khandwa |  | + |  |  | Salvage archaeology (Human origins, genome and peolple of india 2007) |
| Sonpura Mal | Khandwa |  | + |  |  | Salvage archaeology (Human origins, genome and peolple of india 2007) |
| Chandel | Khandwa | + |  |  |  | Salvage archaeology (Human origins, genome and peolple of india 2007) |
| Dharikotla | Khandwa | + |  |  |  | Salvage archaeology (Human origins, genome and peolple of india 2007) |
| Junapani | Khandwa | + |  |  |  | Salvage archaeology (Human origins, genome and peolple of india 2007) |
| Kharikotal | Khandwa | + |  |  |  | Salvage archaeology (Human origins, genome and peolple of india 2007) |
| Mortakka | Khandwa | + |  |  |  | IAR (1970-71) |
| Khadighat | Khandwa | + |  |  |  | IAR (1970-71) |
| Raverkhedi | Khargone | + |  |  |  | IAR 1958-59 |
| Auliya | Khargone |  |  | + |  | IAR (1997-98) |
| Chichali | Khargone | + |  |  |  | IAR (1997-98) |
| Akbarpur | Khargone |  |  | + |  | Mishra et al. 2013 |
| Choli | Khargone |  | + |  |  | IAR (1956-57) |
| Chota Barda | Khargone |  |  | + | + | IAR (1982-83) |
| Khalghar | Khargone | + |  |  |  | IAR (1966-67) |
| Khapadkheda | Khargone |  |  | + |  | Mishra et al. 2013 |
| Mandaleswar | Khargone | + |  |  |  | IAR (1956-57) |
| Mehtakheri* | Khargone |  |  | + |  | Mishra et al. 2013 |
| Navdatoli | Khargone | + |  |  |  | IAR (1956-57) |
| Nawarkheda | Khargone |  |  | + |  | Mishra et al. 2013 |
| Pitnagar | Khargone |  |  | + | + | IAR (1982-83) |
| Burwaha | Khargone | + |  |  |  | IAR (1970-71) |
| Choral river Confluence | Khargone | + |  |  |  | IAR (1984-85) |
| Durkhadi nulla* | Khargone | + |  |  |  | IAR (1970-71) |
| Ramgad | Khargone | + |  |  |  | IAR (1968-69) |
| Dharampuri | Dhar |  |  | + | + | IAR (1981-82) |
| Wasvi | Dhar | + |  |  |  | IAR (1991-92) |
| Chandankheri | Dhar |  |  | + |  | Salvage archaeology in Sardar Sarovar submergence area (Interim report 1994) |
| Karondiya | Dhar |  |  | + |  | Salvage archaeology in Sardar Sarovar submergence area (Interim report 1994); Mishra et al. 2013 |
| Kolgaon | Dhar |  | + |  |  | Salvage archaeology in Sardar Sarovar submergence area (Interim report 1994) |
| Raswa | Dhar |  | + |  |  | Salvage archaeology in Sardar Sarovar submergence area (Interim report 1994) |
| Rekti | Dhar |  | + |  |  | Salvage archaeology in Sardar Sarovar submergence area (Interim report 1994) |
| Dagarpura | Dhar |  | + | + |  | Salvage archaeology in Sardar Sarovar submergence area (Interim report 1994) |
| Semalda | Dhar |  |  | + |  | Salvage archaeology in Sardar Sarovar submergence area (Interim report 1994) |
| Paliya | Barwani |  | + |  |  | Salvage archaeology in Sardar Sarovar submergence area (Interim report 1994) |
| Barwani | Barwani |  | + |  |  | IAR (1958-59) |
| Segawan | Barwani |  |  | + |  | Salvage archaeology in Sardar Sarovar submergence area (Interim report 1994) |
| **Sites in Gujarat** | |  |  |  |  |  |
| Aditeshwara, near Wagaria | Broach |  | + | + |  | IAR (1966-67) |
| Bilwada | Broach |  | + | + |  | IAR (1968-69) |
| Kesarava | Broach |  | + | + |  | IAR (1968-69) |
| Rajalwada | Broach |  | + | + |  | IAR (1968-69) |
| Selot | Broach |  | + |  |  | IAR (1968-69) |
| Vadakunta | Broach |  | + | + |  | IAR (1968-69) |
| Zanzpore, near Zagadia | Broach |  |  | + |  | IAR (1968-69) |
| Bedvan Moti | Broach |  |  | + |  | IAR (1969-70) |
| Sejpur | Broach |  |  | + |  | IAR (1969-70) |
| Beleshwar | Broach | + | + | + |  | IAR (1971-72) |
| Shiyali | Broach |  |  | + |  | IAR (1971-72) |
| Bekharia | Broach |  |  | + |  | IAR (1969-70) |
| Dabheri | Broach |  |  | + |  | IAR (1969-70) |
| Gundia | Broach |  | + | + |  | IAR (1969-70) |
| Handi | Broach |  | + | + |  | IAR (1969-70) |
| Handi | Broach |  | + | + |  | IAR (1969-70) |
| Limdi | Broach |  |  | + |  | IAR (1969-70) |
| Moti Bhauri | Broach |  |  | + |  | IAR (1969-70) |
| Movi | Broach |  | + | + |  | IAR (1969-70) |
| Nani Nikoli | Broach |  | + | + |  | IAR (1969-70) |
| Nava Vaghpura (Jetpur) | Broach |  |  | + |  | IAR (1969-70) |
| Patal | Broach |  | + | + |  | IAR (1969-70) |
| Raipora | Broach |  | + | + |  | IAR (1969-70) |
| Raipura | Broach |  |  | + |  | IAR (1969-70) |
| Rel | Broach |  |  | + |  | IAR (1969-70) |
| Unrwa | Broach |  |  | + |  | IAR (1969-70) |
| Valia | Broach |  | + | + |  | IAR (1969-70) |
| Vavdi | Broach |  |  | + |  | IAR (1969-70) |
|  |  | **106** | **126** | **63** | **69** |  |
| *Excavated sites | | | | | | |

References:

Chauhan, P.R., S. Shaikh, V. Sathe. A short note on a new vertebrate fossil cluster at Amonda, Central Narmada Basin, Madhya Pradesh. In *Art and Archaeology of Madhya Pradesh and Adjoining Regions: Recent Perspectives*. Bhopal: Government of Madhya Pradesh.  Pp. 185-197.

De Terra, H. and T.T. Paterson 1939. *Studies on the Ice Age in India and Associated Human Cultures*. Carnegie Institute Publication No. 493. Washington. pp. 1-354.

*Indian Archaeology: A review.*  Issues: (1958-59, 1959-60, 1960-61, 1961-62, 1962-63, 1963-64, 1964-65, 1966-67, 1968-69, 1970-71, 1972-73, 1974-75, 1976-77, 1977-78, 1981-82, 1984-85, 1985-86, 1986-87, 1991-92, 1994-95, 1996-97, 1997-98, 2012-13

Khatri, A.P. 1961. Stone Age and Pleistocene chronology of the Narmada Valley. *Anthropos* LVI: 519-30

Khatri, A.P., 1963. Recent exploration for the remains of early man in India. *Asian perspectives*, *7*(1/2), pp.160-182.

Khatri, A.P., 1966. The Pleistocene mammalian fossils of the Narmada river valley and their horizons. *Asian Perspectives*, pp.113-133.

Patnaik, R., Chauhan, P.R., Rao, M.R., Blackwell, B.A.B., Skinner, A.R., Sahni, A., Chauhan, M.S. and Khan, H.S., 2009. New geochronological, paleoclimatological, and archaeological data from the Narmada Valley hominin locality, central India. *Journal of Human Evolution*, *56*(2), pp.114-133.

Patnaik, R., Chauhan, P.R. (2011) Quaternary Stratigraphy and Associated Palaeolithic Occurrences in the Central Narmada Valley: Recent Discoveries and New Observations, In Anthropology and Society: Issues and Applications, I. Talwar, A. Ghosh, S. Mehta. K. Sharma. R. Gaur, K. Krishan. G. Pathmanathan (ed.), Northern Book Centre, New Delhi.

Salahuddin, Badam, G.L., 1983. A note on the discovery of upper Palaeolithic Culture from the Central Narmada Valley, Madhya Pradesh. *Current science,* *52*(20), pp.976-978.

Salvage archaeology in Sardar Sarovar submergence area (Interim report 1994)

Sankhyan, A.R., 2010. *Pleistocene hominins and associated findings from Central Narmada Valley bearing on evolution of man in south Asia*. (Doctoral dissertation)

Sankhyan, A. R., Halder, D. P., Chatterjee, R., Paul, J., Chakravorty, S., Dewangan, L. N., Chakravarty, R. and Rao, V. R., 2007. Narmada Project: A brief note on the recent stone implements and fossil faunal findings. In, Sankhyan, A.R. and Rao, V.R., (Eds.) *Human Origins, Genome and People of India: Genomic, Palaeontological and Archaeological Perspectives,* (pp 218-224). Archaeological Survey of India, Kolkata.

Sankhyan, A.R., Dewangan, L.N., Chakraborty, S., Kundu, S., Prabha, S., Chakravarty, R. and Badam, G.L., 2012. New human fossils and associated findings from the Central Narmada Valley, India. *Current Science*, pp.1461-1469.

Sen, D. and Ghosh, A.K., 1963. Lithic culture-complex in the Pleistocene sequence of the Narmada Valley, Central India. *Rivista di scienze preistoriche*, (18), pp.3-23.

Sonakia, A., 1984. The skull cap of early man and associated mammalian fauna from Narmada Valley alluvium, Hoshangabad area, Madhya Pradesh, India. *Records of the Geological survey of India*, *113*(6), pp.159-172.

Sonakia, A. and Biswas, S., 1998. Antiquity of the Narmada Homo erectus, the early man of India. *Current Science*, pp.391-393.

Sonakia, A. and Biswas, S., 2011. *Fossil Mammals Including Early Man from the Quaternary Deposits of the Narmada and Son Basins of Madhya Pradesh India*. Geological Survey of India.

Theobald, W., 1860. On the Tertiary and Alluvial Deposits of the Central Portion of the Nerbudda Valley. *Memoirs of the Geological Survey of India II*, pp.279-298
